# Supplementary material
Source: ML conference proceedings conference paper supplement (https://proceedings.mlr.press/v48/patrini16.html)
Supplement: Supplementary file 1 [file patrini16-supp.pdf]

# Supplement to: Loss factorization, weakly supervised learning and label noise robustness

## A Proofs

### A.1 Proof of Lemma 5

We need to show the double implication that defines sufficiency for  $y$ .

$\Rightarrow$ ) By Factorization Theorem (3),  $R_{S,\ell}(h) - R_{S',\ell}(h)$  is label independent only if the odd part cancels out.

$\Leftarrow$ ) If  $\mu_S = \mu'_S$  then  $R_{S,\ell}(h) - R_{S',\ell}(h)$  is independent of the label, because the label only appears in the mean operator due to Factorization Theorem (3).

### A.2 Proof of Lemma 6

Consider the class of LOLs satisfying  $\ell(x) - \ell(-x) = 2ax$ . For any element of the class, define  $\ell_e(x) = \ell(x) - ax$ , which is even. In fact we have

$$\ell_e(-x) = \ell(-x) + ax = \ell(x) - 2ax + ax = \ell(x) - ax = \ell_e(x) .$$

### A.3 Proof of Theorem 7

We start by proving two helper Lemmas. The next one provides a bound to the Rademacher complexity computed on the sample  $\mathcal{S}_{2x} \doteq \{(\mathbf{x}_i, \sigma), i \in [m], \forall \sigma \in \mathcal{Y}\}$ .

**Lemma 1** *Suppose  $m$  even. Suppose  $\mathcal{X} = \{\mathbf{x} : \|\mathbf{x}\|_2 \leq X\}$  be the observations space, and  $\mathcal{H} = \{\boldsymbol{\theta} : \|\boldsymbol{\theta}\|_2 \leq B\}$  be the space of linear hypotheses. Let  $\mathcal{Y}^{2m} \doteq \times_{j \in [2m]} \mathcal{Y}$ . Then the empirical Rademacher complexity*

$$\mathcal{R}(\mathcal{H} \circ \mathcal{S}_{2x}) \doteq \mathbb{E}_{\sigma \sim \mathcal{Y}^{2m}} \left[ \sup_{\boldsymbol{\theta} \in \mathcal{H}} \frac{1}{2m} \sum_{i \in [2m]} \sigma_i \langle \boldsymbol{\theta}, \mathbf{x}_i \rangle \right]$$

of  $\mathcal{H}$  on  $\mathcal{S}_{2x}$  satisfies:

$$\mathcal{R}(\mathcal{H} \circ \mathcal{S}_{2x}) \leq v \cdot \frac{BX}{\sqrt{2m}} , \tag{1}$$

with  $v \doteq \frac{1}{2} + \frac{1}{2} \sqrt{\frac{1}{2} - \frac{1}{m}}$ .

**Proof** Suppose without loss of generality that  $\mathbf{x}_i = \mathbf{x}_{m+i}$ . The proof relies on the observation that  $\forall \boldsymbol{\sigma} \in \mathcal{Y}^{2m}$ ,

$$\begin{aligned} \arg \sup_{\boldsymbol{\theta} \in \mathcal{H}} \{\mathbb{E}_{\mathcal{S}}[\sigma(\mathbf{x})\langle \boldsymbol{\theta}, \mathbf{x} \rangle]\} &= \frac{1}{2m} \arg \sup_{\boldsymbol{\theta} \in \mathcal{H}} \left\{ \sum_i \sigma_i \langle \boldsymbol{\theta}, \mathbf{x}_i \rangle \right\} \\ &= \frac{\sup_{\mathcal{H}} \|\boldsymbol{\theta}\|_2}{\|\sum_i \sigma_i \mathbf{x}_i\|_2} \sum_i \sigma_i \mathbf{x}_i . \end{aligned} \quad (2)$$

So,

$$\begin{aligned} \mathcal{R}(\mathcal{H} \circ \mathcal{S}_{2x}) &= \mathbb{E}_{\mathcal{Y}^{2m}} \sup_{h \in \mathcal{H}} \{\mathbb{E}_{\mathcal{S}_{2x}}[\sigma(\mathbf{x})h(\mathbf{x})]\} \\ &= \frac{\sup_{\mathcal{H}} \|\boldsymbol{\theta}\|_2}{2m} \cdot \mathbb{E}_{\mathcal{Y}^{2m}} \left[ \frac{\left( \sum_{i=1}^{2m} \sigma_i \mathbf{x}_i \right)^\top \left( \sum_{i=1}^{2m} \sigma_i \mathbf{x}_i \right)}{\|\sum_{i=1}^{2m} \sigma_i \mathbf{x}_i\|_2} \right] \\ &= \sup_{\mathcal{H}} \|\boldsymbol{\theta}\|_2 \cdot \mathbb{E}_{\mathcal{Y}^{2m}} \left[ \frac{1}{2m} \cdot \left\| \sum_{i=1}^{2m} \sigma_i \mathbf{x}_i \right\|_2 \right] . \end{aligned} \quad (3)$$

Now, remark that whenever  $\sigma_i = -\sigma_{m+i}$ ,  $\mathbf{x}_i$  disappears in the sum, and therefore the max norm for the sum may decrease as well. This suggests to split the  $2^{2m}$  assignments into  $2^m$  groups of size  $2^m$ , ranging over the possible number of observations taken into account in the sum. They can be factored by a weighted sum of contributions of each subset of indices  $\mathcal{J} \subseteq [m]$  ranging over the non-duplicated observations:

$$\mathbb{E}_{\mathcal{Y}^{2m}} \left[ \frac{1}{m} \cdot \left\| \sum_{i=1}^{2m} \sigma_i \mathbf{x}_i \right\|_2 \right] = \frac{1}{2^{2m}} \sum_{\mathcal{J} \subseteq [m]} \frac{2^{m-|\mathcal{J}|}}{2m} \cdot \sum_{\boldsymbol{\sigma} \in \mathcal{Y}^{|\mathcal{J}|}} \sqrt{2} \left\| \sum_{i \in \mathcal{J}} \sigma_i \mathbf{x}_i \right\|_2 . \quad (4)$$

$$= \frac{\sqrt{2}}{2^m} \sum_{\mathcal{J} \subseteq [m]} \frac{1}{2m} \cdot \underbrace{\frac{1}{2^{|\mathcal{J}|}} \cdot \sum_{\boldsymbol{\sigma} \in \mathcal{Y}^{|\mathcal{J}|}} \left\| \sum_{i \in \mathcal{J}} \sigma_i \mathbf{x}_i \right\|_2}_{u_{|\mathcal{J}|}} . \quad (5)$$

The  $\sqrt{2}$  factor appears because of the fact that we now consider only the observations of  $\mathcal{S}$ . Now, for any *fixed*  $\mathcal{J}$ , we renumber its observations in  $[\mathcal{J}]$  for simplicity, and observe that, since  $\sqrt{1+x} \leq 1+x/2$ ,

$$u_{|\mathcal{J}|} = \frac{1}{2^{|\mathcal{J}|}} \sum_{\sigma \in \mathcal{Y}^{|\mathcal{J}|}} \sqrt{\sum_{i \in \mathcal{J}} \|\mathbf{x}_i\|_2^2 + \sum_{i_1 \neq i_2} \sigma_{i_1} \sigma_{i_2} \mathbf{x}_{i_1}^\top \mathbf{x}_{i_2}} \quad (6)$$

$$= \frac{\sqrt{\sum_{i \in \mathcal{J}} \|\mathbf{x}_i\|_2^2}}{2^{|\mathcal{J}|}} \sum_{\sigma \in \mathcal{Y}^{|\mathcal{J}|}} \sqrt{1 + \frac{\sum_{i_1 \neq i_2} \sigma_{i_1} \sigma_{i_2} \mathbf{x}_{i_1}^\top \mathbf{x}_{i_2}}{\sum_{i \in \mathcal{J}} \|\mathbf{x}_i\|_2^2}} \quad (7)$$

$$\leq \frac{\sqrt{\sum_{i \in \mathcal{J}} \|\mathbf{x}_i\|_2^2}}{2^{|\mathcal{J}|}} \sum_{\sigma \in \mathcal{Y}^{|\mathcal{J}|}} \left( 1 + \frac{\sum_{i_1 \neq i_2} \sigma_{i_1} \sigma_{i_2} \mathbf{x}_{i_1}^\top \mathbf{x}_{i_2}}{2 \sum_{i \in \mathcal{J}} \|\mathbf{x}_i\|_2^2} \right) \quad (8)$$

$$= \sqrt{\sum_{i \in \mathcal{J}} \|\mathbf{x}_i\|_2^2} + \frac{1}{2^{|\mathcal{J}|} \cdot 2 \sum_{i \in \mathcal{J}} \|\mathbf{x}_i\|_2^2} \cdot \sum_{\sigma \in \mathcal{Y}^{|\mathcal{J}|}} \sum_{i_1 \neq i_2} \sigma_{i_1} \sigma_{i_2} \mathbf{x}_{i_1}^\top \mathbf{x}_{i_2} \quad (9)$$

$$= \sqrt{\sum_{i \in \mathcal{J}} \|\mathbf{x}_i\|_2^2} + \frac{1}{2^{|\mathcal{J}|} \cdot 2 \sum_{i \in \mathcal{J}} \|\mathbf{x}_i\|_2^2} \cdot \sum_{i_1 \neq i_2} \mathbf{x}_{i_1}^\top \mathbf{x}_{i_2} \cdot \underbrace{\left( \sum_{\sigma \in \mathcal{Y}^{|\mathcal{J}|}} \sigma_{i_1} \sigma_{i_2} \right)}_{=0} \quad (10)$$

$$= \sqrt{\sum_{i \in \mathcal{J}} \|\mathbf{x}_i\|_2^2} \quad (11)$$

$$\leq \sqrt{|\mathcal{J}|} \cdot X. \quad (12)$$

Plugging this in eq. (5) yields

$$\frac{1}{X} \cdot \mathbb{E}_{\mathcal{Y}^{2m}} \left[ \frac{1}{m} \cdot \left\| \sum_{i=1}^{2m} \sigma_i \mathbf{x}_i \right\|_2 \right] \leq \frac{\sqrt{2}}{2^m} \sum_{k=0}^m \frac{\sqrt{k}}{2m} \binom{m}{k}. \quad (13)$$

Since  $m$  is even:

$$\mathbb{E}_{\mathcal{Y}^{2m}} \left[ \frac{1}{2m} \cdot \left\| \sum_{i=1}^{2m} \sigma_i \mathbf{x}_i \right\|_2 \right] \leq \frac{\sqrt{2}}{2^m} \sum_{k=0}^{(m/2)-1} \frac{\sqrt{k}}{2m} \binom{m}{k} + \frac{\sqrt{2}}{2^m} \sum_{k=m/2}^m \frac{\sqrt{k}}{2m} \binom{m}{k}. \quad (14)$$

Notice that the left one trivially satisfies

$$\begin{aligned} \frac{\sqrt{2}}{2^m} \sum_{k=0}^{(m/2)-1} \frac{\sqrt{k}}{2m} \binom{m}{k} &\leq \frac{\sqrt{2}}{2^m} \sum_{k=0}^{(m/2)-1} \frac{1}{2m} \cdot \sqrt{\frac{m-2}{2}} \binom{m}{k} \\ &= \frac{1}{2} \cdot \sqrt{\frac{1}{m} - \frac{2}{m^2}} \cdot \frac{1}{2^m} \sum_{k=0}^{(m/2)-1} \binom{m}{k} \\ &\leq \frac{1}{4} \cdot \sqrt{\frac{1}{m} - \frac{2}{m^2}} \end{aligned} \quad (15)$$

Also, the right one satisfies:

$$\begin{aligned} \frac{\sqrt{2}}{2^m} \sum_{k=m/2}^m \frac{\sqrt{k}}{2m} \binom{m}{k} &\leq \frac{\sqrt{2}}{2^m} \sum_{k=m/2}^m \frac{\sqrt{m}}{2m} \binom{m}{k} \\ &= \frac{1}{\sqrt{2m}} \cdot \frac{1}{2^m} \sum_{k=m/2}^m \binom{m}{k} \\ &= \frac{1}{2} \cdot \frac{1}{\sqrt{2m}}. \end{aligned} \quad (16)$$

We get

$$\frac{1}{X} \cdot \mathbb{E}_{\mathbf{y}^{2m}} \left[ \frac{1}{m} \cdot \left\| \sum_{i=1}^{2m} \sigma_i \mathbf{x}_i \right\|_2 \right] \leq \frac{1}{4} \cdot \sqrt{\frac{1}{m} - \frac{2}{m^2}} + \frac{1}{2} \cdot \sqrt{\frac{1}{2m}} \quad (17)$$

$$= \frac{1}{\sqrt{2m}} \cdot \left( \frac{1}{2} + \frac{1}{2} \sqrt{\frac{1}{2} - \frac{1}{m}} \right). \quad (18)$$

And finally:

$$\mathcal{R}(\mathcal{H} \circ \mathcal{S}_{2x}) \leq v \cdot \frac{BX}{\sqrt{2m}}, \quad (19)$$

with

$$v \doteq \frac{1}{2} + \frac{1}{2} \sqrt{\frac{1}{2} - \frac{1}{m}}, \quad (20)$$

as claimed. ■

The second Lemma is a straightforward application of McDiarmid's inequality [[McDiarmid, 1998](#)] to evaluate the convergence of the empirical mean operator to its population counterpart.

**Lemma 2** *Suppose  $\mathbb{R}^d \supseteq \mathcal{X} = \{\mathbf{x} : \|\mathbf{x}\|_2 \leq X < \infty\}$  be the observations space. Then for any  $\delta > 0$  with probability at least  $1 - \delta$*

$$\|\boldsymbol{\mu}_{\mathcal{D}} - \boldsymbol{\mu}_{\mathcal{S}}\|_2 \leq X \cdot \sqrt{\frac{d}{m} \log\left(\frac{d}{\delta}\right)}.$$

**Proof** Let  $\mathcal{S}$  and  $\mathcal{S}'$  be two learning samples that differ for only one example  $(\mathbf{x}_i, y_i) \neq (\mathbf{x}_{i'}, y_{i'})$ . Let first consider the one-dimensional case. We refer to the  $k$ -dimensional component of  $\boldsymbol{\mu}$  with  $\boldsymbol{\mu}^k$ . For any  $\mathcal{S}, \mathcal{S}'$  and any  $k \in [d]$  it holds

$$\begin{aligned} |\boldsymbol{\mu}_{\mathcal{S}}^k - \boldsymbol{\mu}_{\mathcal{S}'}^k| &= \frac{1}{m} |\mathbf{x}_i^k y_i - \mathbf{x}_{i'}^k y_{i'}| \\ &\leq \frac{X}{m} |y_i - y_{i'}| \\ &\leq \frac{2X}{m}. \end{aligned}$$

This satisfies the bounded difference condition of McDiarmid's inequality, which let us write for any  $k \in [d]$  and any  $\epsilon > 0$  that

$$\mathbb{P}(|\boldsymbol{\mu}_{\mathcal{D}}^k - \boldsymbol{\mu}_{\mathcal{S}}^k| \geq \epsilon) \leq \exp\left(-\frac{m\epsilon^2}{2X^2}\right)$$

and the multi-dimensional case, by union bound

$$\mathbb{P}(\exists k \in [d] : |\boldsymbol{\mu}_{\mathcal{D}}^k - \boldsymbol{\mu}_{\mathcal{S}}^k| \geq \epsilon) \leq d \exp\left(-\frac{m\epsilon^2}{2X^2}\right).$$

Then by negation

$$\mathbb{P}(\forall k \in [d] : |\boldsymbol{\mu}_{\mathcal{D}}^k - \boldsymbol{\mu}_{\mathcal{S}}^k| \leq \epsilon) \geq 1 - d \exp\left(-\frac{m\epsilon^2}{2X^2}\right),$$

which implies that for any  $\delta > 0$  with probability  $1 - \delta$

$$X \sqrt{\frac{2}{m} \log \left( \frac{d}{\delta} \right)} \geq \|\boldsymbol{\mu}_{\mathcal{D}} - \boldsymbol{\mu}_{\mathcal{S}}\|_{\infty} \geq d^{-1/2} \|\boldsymbol{\mu}_{\mathcal{D}} - \boldsymbol{\mu}_{\mathcal{S}}\|_2 .$$

This concludes the proof. ■

We now restate and prove Theorem 7.

**Theorem 7** Assume  $\ell$  is  $\alpha$ -LOL and  $L$ -Lipschitz. Suppose  $\mathbb{R}^d \supseteq \mathcal{X} = \{\mathbf{x} : \|\mathbf{x}\|_2 \leq X < \infty\}$  be the observations space, and  $\mathcal{H} = \{\boldsymbol{\theta} : \|\boldsymbol{\theta}\|_2 \leq B < \infty\}$  be the space of linear hypotheses. Let  $c(X, B) \doteq \max_{y \in \mathcal{Y}} \ell(yXB)$ . Let  $\hat{\boldsymbol{\theta}} = \operatorname{argmin}_{\boldsymbol{\theta} \in \mathcal{H}} R_{\mathcal{S}, \ell}(\boldsymbol{\theta})$ . Then for any  $\delta > 0$ , with probability at least  $1 - \delta$

$$R_{\mathcal{D}, \ell}(\hat{\boldsymbol{\theta}}) - R_{\mathcal{D}, \ell}(\boldsymbol{\theta}^*) \leq \left( \frac{\sqrt{2} + 1}{4} \right) \cdot \frac{XBL}{\sqrt{m}} + \frac{c(X, B)L}{2} \cdot \sqrt{\frac{1}{m} \log \left( \frac{1}{\delta} \right)} + 2|a|B \cdot \|\boldsymbol{\mu}_{\mathcal{D}} - \boldsymbol{\mu}_{\mathcal{S}}\|_2 ,$$

or more explicitly

$$R_{\mathcal{D}, \ell}(\hat{\boldsymbol{\theta}}) - R_{\mathcal{D}, \ell}(\boldsymbol{\theta}^*) \leq \left( \frac{\sqrt{2} + 1}{4} \right) \cdot \frac{XBL}{\sqrt{m}} + \frac{c(X, B)L}{2} \sqrt{\frac{1}{m} \log \left( \frac{2}{\delta} \right)} + 2|a|XB \sqrt{\frac{d}{m} \log \left( \frac{2d}{\delta} \right)} .$$

**Proof** Let  $\boldsymbol{\theta}^* = \operatorname{argmin}_{\boldsymbol{\theta} \in \mathcal{H}} R_{\mathcal{D}, \ell}(\boldsymbol{\theta})$ . We have

$$\begin{aligned} R_{\mathcal{D}, \ell}(\hat{\boldsymbol{\theta}}) - R_{\mathcal{D}, \ell}(\boldsymbol{\theta}^*) &= \frac{1}{2} R_{\mathcal{D}_{2x}, \ell}(\hat{\boldsymbol{\theta}}) + a \langle \hat{\boldsymbol{\theta}}, \boldsymbol{\mu}_{\mathcal{D}} \rangle - \frac{1}{2} R_{\mathcal{D}_{2x}, \ell}(\boldsymbol{\theta}^*) - a \langle \boldsymbol{\theta}^*, \boldsymbol{\mu}_{\mathcal{D}} \rangle & (21) \\ &= \frac{1}{2} \left( R_{\mathcal{D}_{2x}, \ell}(\hat{\boldsymbol{\theta}}) - R_{\mathcal{D}_{2x}, \ell}(\boldsymbol{\theta}^*) \right) + a \langle \hat{\boldsymbol{\theta}} - \boldsymbol{\theta}^*, \boldsymbol{\mu}_{\mathcal{D}} \rangle \\ &= \frac{1}{2} \left( R_{\mathcal{S}_{2x}, \ell}(\hat{\boldsymbol{\theta}}) - R_{\mathcal{S}_{2x}, \ell}(\boldsymbol{\theta}^*) \right) + a \langle \hat{\boldsymbol{\theta}} - \boldsymbol{\theta}^*, \boldsymbol{\mu}_{\mathcal{D}} \rangle \\ &\quad + \frac{1}{2} \left( R_{\mathcal{D}_{2x}, \ell}(\hat{\boldsymbol{\theta}}) - R_{\mathcal{S}_{2x}, \ell}(\hat{\boldsymbol{\theta}}) - R_{\mathcal{D}_{2x}, \ell}(\boldsymbol{\theta}^*) + R_{\mathcal{S}_{2x}, \ell}(\boldsymbol{\theta}^*) \right) \} A_1 . & (22) \end{aligned}$$

Step 21 is obtained by the equality  $R_{\mathcal{D}, \ell}(\boldsymbol{\theta}) = \frac{1}{2} R_{\mathcal{D}_{2x}, \ell}(\boldsymbol{\theta}) + a \langle \boldsymbol{\theta}, \boldsymbol{\mu}_{\mathcal{D}} \rangle$  for any  $\boldsymbol{\theta}$ . Now, rename Line 22 as  $A_1$ . Applying the same equality with regard to  $\mathcal{S}$ , we have

$$R_{\mathcal{D}, \ell}(\hat{\boldsymbol{\theta}}) - R_{\mathcal{D}, \ell}(\boldsymbol{\theta}^*) \leq \underbrace{R_{\mathcal{S}, \ell}(\hat{\boldsymbol{\theta}}) - R_{\mathcal{S}, \ell}(\boldsymbol{\theta}^*)}_{A_2} + \underbrace{a \langle \hat{\boldsymbol{\theta}} - \boldsymbol{\theta}^*, \boldsymbol{\mu}_{\mathcal{D}} - \boldsymbol{\mu}_{\mathcal{S}} \rangle}_{A_3} + A_1 .$$

Now,  $A_2$  is never more than 0 because  $\hat{\boldsymbol{\theta}}$  is the minimizer of  $R_{\mathcal{S}, \ell}(\boldsymbol{\theta})$ . From the Cauchy-Schwarz inequality and bounded models it holds true that

$$A_3 \leq |a| \|\hat{\boldsymbol{\theta}} - \boldsymbol{\theta}^*\|_2 \cdot \|\boldsymbol{\mu}_{\mathcal{D}} - \boldsymbol{\mu}_{\mathcal{S}}\|_2 \leq 2|a|B \|\boldsymbol{\mu}_{\mathcal{D}} - \boldsymbol{\mu}_{\mathcal{S}}\|_2 . \quad (23)$$

We could treat  $A_1$  by calling standard bounds based on Rademacher complexity on a sample with size  $2m$  [Bartlett and Mendelson, 2002]. Indeed, since the complexity does not depend on labels, its value would be the same –modulo the change of sample size– for both  $\mathcal{S}$  and  $\mathcal{S}_{2x}$ , as they are computed with same loss and observations. However, the special structure of  $\mathcal{S}_{2x}$  allows us to obtain a tighter structural complexity term, due to some cancellation effect. The fact is proven by Lemma 1. In order to exploit it, we first observe that

$$\begin{aligned} A_1 &\leq \frac{1}{2} \left( R_{\mathcal{D}_{2x}, \ell}(\hat{\boldsymbol{\theta}}) - R_{\mathcal{S}_{2x}, \ell}(\hat{\boldsymbol{\theta}}) - R_{\mathcal{D}_{2x}, \ell}(\boldsymbol{\theta}^*) + R_{\mathcal{S}_{2x}, \ell}(\boldsymbol{\theta}^*) \right) \\ &\leq \sup_{\boldsymbol{\theta} \in \mathcal{H}} |R_{\mathcal{D}_{2x}, \ell}(\boldsymbol{\theta}) - R_{\mathcal{S}_{2x}, \ell}(\boldsymbol{\theta})| \end{aligned}$$

which by standard arguments [Bartlett and Mendelson, 2002] and the application of Lemma 1 gives a bound with probability at least  $1 - \delta$ ,  $\delta > 0$

$$\begin{aligned} A_1 &\leq 2L \cdot \mathcal{R}(\mathcal{H} \circ \mathcal{S}_{2x}) + c(X, B)L \cdot \sqrt{\frac{1}{4m} \log\left(\frac{1}{\delta}\right)} \\ &\leq L \cdot \frac{\sqrt{2} + 1}{\sqrt{2}} \cdot \frac{BX}{\sqrt{2m}} + c(X, B)L \cdot \sqrt{\frac{1}{4m} \log\left(\frac{1}{\delta}\right)} \end{aligned}$$

where  $c(X, B) \doteq \max_{y \in \mathcal{Y}} \ell(yXB)$  and because  $\frac{1}{2} + \frac{1}{2}\sqrt{\frac{1}{2} - \frac{1}{m}} < \left(\frac{\sqrt{2}+1}{\sqrt{2}}\right)$ ,  $\forall m > 0$ . We combine the results and get with probability at least  $1 - \delta$ ,  $\delta > 0$  that

$$R_{\mathcal{D}, \ell}(\hat{\boldsymbol{\theta}}) - R_{\mathcal{D}, \ell}(\boldsymbol{\theta}^*) \leq \left(\frac{\sqrt{2} + 1}{2}\right) \cdot \frac{XBL}{\sqrt{m}} + \frac{c(X, B)L}{2} \cdot \sqrt{\frac{1}{m} \log\left(\frac{1}{\delta}\right)} + 2|a|B \cdot \|\boldsymbol{\mu}_{\mathcal{D}} - \boldsymbol{\mu}_{\mathcal{S}}\|_2. \quad (24)$$

This proves the first part of the statement. For the second one, we apply Lemma 2 that provides the probabilistic bound for the norm discrepancy of the mean operators. Consider that both statements are true with probability at least  $1 - \delta/2$ . We write

$$\begin{aligned} \mathbb{P}\left(\left\{R_{\mathcal{D}, \ell}(\hat{\boldsymbol{\theta}}) - R_{\mathcal{D}, \ell}(\boldsymbol{\theta}^*) \leq \left(\frac{\sqrt{2} + 1}{2}\right) \cdot \frac{XBL}{\sqrt{m}} + \frac{c(X, B)L}{2} \cdot \sqrt{\frac{1}{m} \log\left(\frac{2}{\delta}\right)} + 2|a|B \cdot \|\boldsymbol{\mu}_{\mathcal{D}} - \boldsymbol{\mu}_{\mathcal{S}}\|_2\right\}\right. \\ \left.\wedge \left\{\|\boldsymbol{\mu}_{\mathcal{D}} - \boldsymbol{\mu}_{\mathcal{S}}\|_2 \leq X \cdot \sqrt{\frac{d}{m} \log\left(\frac{2d}{\delta}\right)}\right\}\right) \geq 1 - \delta/2 - \delta/2 = 1 - \delta, \end{aligned}$$

and therefore with probability  $1 - \delta$

$$R_{\mathcal{D}, \ell}(\hat{\boldsymbol{\theta}}) - R_{\mathcal{D}, \ell}(\boldsymbol{\theta}^*) \leq \left(\frac{\sqrt{2} + 1}{2}\right) \cdot \frac{XBL}{\sqrt{m}} + \frac{c(X, B)L}{2} \cdot \sqrt{\frac{1}{m} \log\left(\frac{2}{\delta}\right)} + 2|a|XB \cdot \sqrt{\frac{d}{m} \log\left(\frac{2d}{\delta}\right)}. \quad \blacksquare$$

#### A.4 Unbiased estimator for the mean operator with asymmetric label noise

Natarajan et al. [2013, Lemma 1] provides an unbiased estimator for a loss  $\ell(x)$  computed on  $x$  of the form:

$$\hat{\ell}(y\langle \boldsymbol{\theta}, \mathbf{x}_i \rangle) \doteq \frac{(1 - p_{-y}) \cdot \ell(\langle \boldsymbol{\theta}, \mathbf{x}_i \rangle) + p_y \cdot \ell(-\langle \boldsymbol{\theta}, \mathbf{x}_i \rangle)}{1 - p_{-} - p_{+}}$$

We apply it for estimating the mean operator instead of, from another perspective, for estimating a linear (unhinged) loss as in van Rooyen et al. [2015]. We are allowed to do so by the very result of the Factorization Theorem, since the noise corruption has effect on the linear-odd term of the loss only. The estimator of the sufficient statistic of a single example  $y\mathbf{x}$  is

$$\begin{aligned} \hat{\mathbf{z}} &\doteq \frac{1 - p_{-y} + p_y}{1 - p_{-} - p_{+}} y\mathbf{x} \\ &= \frac{1 - (p_{-} - p_{+})y}{1 - p_{-} - p_{+}} y\mathbf{x} \\ &= \frac{y - (p_{-} - p_{+})}{1 - p_{-} - p_{+}} \mathbf{x}, \end{aligned}$$

and its average, *i.e.* the mean operator estimator, is

$$\hat{\boldsymbol{\mu}}_{\mathcal{S}} \doteq \mathbb{E}_{\mathcal{S}} \left[ \frac{y - (p_- + p_+)}{1 - p_- - p_+} \mathbf{x} \right] ,$$

such that in expectation over the noisy distribution it holds  $\mathbb{E}_{\tilde{\mathcal{D}}} [\hat{\mathbf{z}}] = \boldsymbol{\mu}_{\mathcal{D}}$ . Moreover, the corresponding risk enjoys the same unbiasedness property. In fact

$$\begin{aligned} \hat{R}_{\tilde{\mathcal{D}},\ell}(\boldsymbol{\theta}) &= \frac{1}{2} R_{\mathcal{D}_{2x},\ell}(\boldsymbol{\theta}) + \mathbb{E}_{\tilde{\mathcal{D}}} [a(\boldsymbol{\theta}, \hat{\mathbf{z}})] \\ &= \frac{1}{2} R_{\mathcal{D}_{2x},\ell}(\boldsymbol{\theta}) + a(\boldsymbol{\theta}, \hat{\boldsymbol{\mu}}_{\tilde{\mathcal{D}}}) \\ &= \frac{1}{2} R_{\mathcal{D}_{2x},\ell}(\boldsymbol{\theta}) + a(\boldsymbol{\theta}, \boldsymbol{\mu}_{\mathcal{D}}) \\ &= R_{\mathcal{D},\ell}(\boldsymbol{\theta}) , \end{aligned} \tag{25}$$

where we have also used the independency on labels (and therefore of label noise) of  $R_{\mathcal{D}_{2x},\ell}$ .

## A.5 Proof of Theorem 8

This Theorem is a version of Theorem 7 applied to the case of asymmetric label noise. Those results differ in three elements. First, we consider the generalization property of a minimizer  $\hat{\boldsymbol{\theta}}$  that is learnt on the corrupted sample  $\tilde{\mathcal{S}}$ . Second, the minimizer is computed on the basis of the unbiased estimator of  $\hat{\boldsymbol{\mu}}_{\tilde{\mathcal{S}}}$  and not barely  $\boldsymbol{\mu}_{\tilde{\mathcal{S}}}$ . Third, as a consequence, Lemma 2 is not valid in this scenario. Therefore, we first prove a version of the bound for the mean operator norm discrepancy while considering label noise.

**Lemma 3** *Suppose  $\mathbb{R}^d \supseteq \mathcal{X} = \{\mathbf{x} : \|\mathbf{x}\|_2 \leq X < \infty\}$  be the observations space. Let  $\tilde{\mathcal{S}}$  is a learning sample affected by asymmetric label noise with noise rates  $(p_+, p_-) \in [0, 1/2)$ . Then for any  $\delta > 0$  with probability at least  $1 - \delta$*

$$\|\hat{\boldsymbol{\mu}}_{\tilde{\mathcal{D}}} - \hat{\boldsymbol{\mu}}_{\tilde{\mathcal{S}}}\|_2 \leq \frac{X}{1 - p_- - p_+} \cdot \sqrt{\frac{d}{m} \log \left( \frac{d}{\delta} \right)} .$$

**Proof** Let  $\tilde{\mathcal{S}}$  and  $\tilde{\mathcal{S}}'$  be two learning samples from the corrupted distribution  $\tilde{\mathcal{D}}$  that differ for only one example  $(\mathbf{x}_i, \tilde{y}_i) \neq (\mathbf{x}_{i'}, \tilde{y}_{i'})$ . Let first consider the one-dimensional case. We refer to the  $k$ -dimensional component of  $\boldsymbol{\mu}$  with  $\boldsymbol{\mu}^k$ . For any  $\tilde{\mathcal{S}}, \tilde{\mathcal{S}}'$  and any  $k \in [d]$  it holds

$$\begin{aligned} |\hat{\boldsymbol{\mu}}_{\tilde{\mathcal{S}}}^k - \hat{\boldsymbol{\mu}}_{\tilde{\mathcal{S}}'}^k| &= \frac{1}{m} \left| \left( \frac{\tilde{y}_i - (p_- - p_+)}{1 - p_- - p_+} \right) \mathbf{x}_i^k - \left( \frac{\tilde{y}_{i'} - (p_- - p_+)}{1 - p_- - p_+} \right) \mathbf{x}_{i'}^k \right| \\ &= \frac{1}{m} \left| \frac{\tilde{y}_i \mathbf{x}_i^k}{1 - p_- - p_+} - \frac{\tilde{y}_{i'} \mathbf{x}_{i'}^k}{1 - p_- - p_+} \right| \\ &\leq \frac{X}{m(1 - p_- - p_+)} |\tilde{y}_i - \tilde{y}_{i'}| \\ &\leq \frac{2X}{m(1 - p_- - p_+)} . \end{aligned}$$

This satisfies the bounded difference condition of McDiarmid's inequality, which let us write for any  $k \in [d]$  and any  $\epsilon > 0$  that

$$\mathbb{P} \left( |\hat{\boldsymbol{\mu}}_{\tilde{\mathcal{D}}}^k - \hat{\boldsymbol{\mu}}_{\tilde{\mathcal{S}}}^k| \geq \epsilon \right) \leq \exp \left( -(1 - p_- - p_+)^2 \frac{m\epsilon^2}{2X^2} \right)$$

and the multi-dimensional case, by union bound

$$\mathbb{P}(\exists k \in [d] : |\hat{\boldsymbol{\mu}}_{\mathcal{D}}^k - \hat{\boldsymbol{\mu}}_{\mathcal{S}}^k| \geq \epsilon) \leq d \exp\left(-\frac{(1-p_- - p_+)^2 m \epsilon^2}{2X^2}\right).$$

Then by negation

$$\mathbb{P}(\forall k \in [d] : |\hat{\boldsymbol{\mu}}_{\mathcal{D}}^k - \hat{\boldsymbol{\mu}}_{\mathcal{S}}^k| \leq \epsilon) \geq 1 - d \exp\left(-\frac{(1-p_- - p_+)^2 m \epsilon^2}{2X^2}\right),$$

which implies that for any  $\delta > 0$  with probability  $1 - \delta$

$$\frac{X}{(1-p_- - p_+)} \sqrt{\frac{2}{m} \log\left(\frac{d}{\delta}\right)} \geq \|\hat{\boldsymbol{\mu}}_{\mathcal{D}} - \hat{\boldsymbol{\mu}}_{\mathcal{S}}\|_{\infty} \geq d^{-1/2} \|\boldsymbol{\mu}_{\mathcal{D}} - \boldsymbol{\mu}_{\mathcal{S}}\|_2.$$

This concludes the proof. ■

The proof of Theorem 8 follows the structure of Theorem 7's and elements of Natarajan et al. [2013, Theorem 3]'s. Let  $\hat{\boldsymbol{\theta}} = \operatorname{argmin}_{\boldsymbol{\theta} \in \mathcal{H}} \hat{R}_{\hat{\mathcal{D}},\ell}(\boldsymbol{\theta})$  and  $\boldsymbol{\theta}^* = \operatorname{argmin}_{\boldsymbol{\theta} \in \mathcal{H}} R_{\mathcal{D},\ell}(\boldsymbol{\theta})$ . We have

$$\begin{aligned} R_{\mathcal{D},\ell}(\hat{\boldsymbol{\theta}}) - R_{\mathcal{D},\ell}(\boldsymbol{\theta}^*) &= \hat{R}_{\hat{\mathcal{D}},\ell}(\hat{\boldsymbol{\theta}}) - \hat{R}_{\hat{\mathcal{D}},\ell}(\boldsymbol{\theta}^*) \\ &= \frac{1}{2} R_{\mathcal{D}_{2x},\ell}(\hat{\boldsymbol{\theta}}) + a \langle \hat{\boldsymbol{\theta}}, \hat{\boldsymbol{\mu}}_{\hat{\mathcal{D}}} \rangle - \frac{1}{2} R_{\mathcal{D}_{2x},\ell}(\boldsymbol{\theta}^*) - a \langle \boldsymbol{\theta}^*, \hat{\boldsymbol{\mu}}_{\hat{\mathcal{D}}} \rangle \\ &= \frac{1}{2} \left( R_{\mathcal{D}_{2x},\ell}(\hat{\boldsymbol{\theta}}) - R_{\mathcal{D}_{2x},\ell}(\boldsymbol{\theta}^*) \right) + a \langle \hat{\boldsymbol{\theta}} - \boldsymbol{\theta}^*, \hat{\boldsymbol{\mu}}_{\hat{\mathcal{D}}} \rangle \\ &= \frac{1}{2} \left( R_{\mathcal{S}_{2x},\ell}(\hat{\boldsymbol{\theta}}) - R_{\mathcal{S}_{2x},\ell}(\boldsymbol{\theta}^*) \right) + a \langle \hat{\boldsymbol{\theta}} - \boldsymbol{\theta}^*, \hat{\boldsymbol{\mu}}_{\hat{\mathcal{D}}} \rangle \\ &\quad + \frac{1}{2} \left( R_{\mathcal{D}_{2x},\ell}(\hat{\boldsymbol{\theta}}) - R_{\mathcal{S}_{2x},\ell}(\hat{\boldsymbol{\theta}}) - R_{\mathcal{D}_{2x},\ell}(\boldsymbol{\theta}^*) + R_{\mathcal{S}_{2x},\ell}(\boldsymbol{\theta}^*) \right) \} A_1. \end{aligned} \quad (26)$$

Step 26 is due to unbiasedness shown in Section A.4. Again, rename Line 27 as  $A_1$ , which this time is bounded directly by Theorem 7. Next, we proceed as within the proof of Theorem 7 but now exploiting the fact that  $\frac{1}{2} R_{\mathcal{S}_{2x},\ell}(\boldsymbol{\theta}) = \hat{R}_{\hat{\mathcal{S}},\ell}(\boldsymbol{\theta}) - a \langle \boldsymbol{\theta}, \hat{\boldsymbol{\mu}}_{\hat{\mathcal{D}}} \rangle$

$$R_{\mathcal{D},\ell}(\hat{\boldsymbol{\theta}}) - R_{\mathcal{D},\ell}(\boldsymbol{\theta}^*) \leq \underbrace{\hat{R}_{\hat{\mathcal{S}},\ell}(\hat{\boldsymbol{\theta}}) - \hat{R}_{\hat{\mathcal{S}},\ell}(\boldsymbol{\theta}^*)}_{A_2} + \underbrace{a \langle \hat{\boldsymbol{\theta}} - \boldsymbol{\theta}^*, \hat{\boldsymbol{\mu}}_{\hat{\mathcal{D}}} - \hat{\boldsymbol{\mu}}_{\hat{\mathcal{S}}} \rangle}_{A_3} + A_1.$$

Now,  $A_2$  is never more than 0 because  $\hat{\boldsymbol{\theta}}$  is the minimizer of  $\hat{R}_{\hat{\mathcal{S}},\ell}(\boldsymbol{\theta})$ . From the Cauchy-Schwarz inequality and bounded models it holds true that

$$A_3 \leq |a| \|\hat{\boldsymbol{\theta}} - \boldsymbol{\theta}^*\|_2 \cdot \|\hat{\boldsymbol{\mu}}_{\hat{\mathcal{D}}} - \hat{\boldsymbol{\mu}}_{\hat{\mathcal{S}}}\|_2 \leq 2|a|B \|\hat{\boldsymbol{\mu}}_{\hat{\mathcal{D}}} - \hat{\boldsymbol{\mu}}_{\hat{\mathcal{S}}}\|_2, \quad (28)$$

for which we can call Lemma 3. Finally, by a union bound we get that for any  $\delta > 0$  with probability  $1 - \delta$

$$R_{\mathcal{D},\ell}(\hat{\boldsymbol{\theta}}) - R_{\mathcal{D},\ell}(\boldsymbol{\theta}^*) \leq \left(\frac{\sqrt{2}+1}{2}\right) \cdot \frac{XBL}{\sqrt{m}} + \frac{c(X,B)L}{2} \sqrt{\frac{1}{m} \log\left(\frac{2}{\delta}\right)} + \frac{2|a|XB}{1-p_+ - p_-} \sqrt{\frac{d}{m} \log\left(\frac{2d}{\delta}\right)}.$$

## A.6 Proof of Theorem 10

We now restate and prove Theorem 8. The reader might question the bound for the fact that the quantity on the right-hand side can change by rescaling  $\boldsymbol{\mu}_{\mathcal{D}}$  by  $X$ , *i.e.* the max  $L_2$  norm of observations in the space  $\mathcal{X}$ . Although, such transformation would affect  $\ell$ -risks on the left-hand side as well, balancing the effect. With this



in mind, we formulate the result without making explicit dependency on  $X$ .

**Theorem 10** Assume  $\{\theta \in \mathcal{H} : \|\theta\|_2 \leq B\}$ . Let  $(\theta^*, \tilde{\theta}^*)$  respectively the minimizers of  $(R_{\mathcal{D},\ell}(\theta), R_{\tilde{\mathcal{D}},\ell}(\theta))$  in  $\mathcal{H}$ . Then every  $a$ -LOL is  $\epsilon$ -ALN. That is

$$R_{\tilde{\mathcal{D}},\ell}(\theta^*) - R_{\tilde{\mathcal{D}},\ell}(\tilde{\theta}^*) \leq 4|a|B \max(p_-, p_+) \cdot \|\mu_{\mathcal{D}}\|_2 .$$

Moreover:

1. If  $\|\mu_{\mathcal{D}}\|_2 = 0$  for  $\mathcal{D}$  then every LOL is ALN for any  $\tilde{\mathcal{D}}$ .
2. Suppose that  $\ell$  is also once differentiable and  $\gamma$ -strongly convex. Then  $\|\theta^* - \tilde{\theta}^*\|_2^2 \leq 2\epsilon/\gamma$ .

**Proof** The proof draws ideas from [Manwani and Sastry \[2013\]](#). Let us first assume the noise to be symmetric, i.e.  $p_+ = p_- = p$ . For any  $\theta$  we have

$$\begin{aligned} R_{\tilde{\mathcal{D}},\ell}(\theta^*) - R_{\tilde{\mathcal{D}},\ell}(\theta) &= (1-p)(R_{\mathcal{D},\ell}(\theta^*) - R_{\mathcal{D},\ell}(\theta)) \\ &\quad + p(R_{\mathcal{D},\ell}(\theta^*) - R_{\mathcal{D},\ell}(\theta) + 2a\langle \theta^* - \theta, \mu_{\mathcal{D}} \rangle) \end{aligned} \quad (29)$$

$$\leq (R_{\mathcal{D},\ell}(\theta^*) - R_{\mathcal{D},\ell}(\theta)) + 4|a|Bp\|\mu_{\mathcal{D}}\|_2 \quad (30)$$

$$\leq 4|a|Bp\|\mu_{\mathcal{D}}\|_2 . \quad (31)$$

We are working with LOLs, which are such that  $\ell(x) = \ell(-x) + 2ax$  and therefore we can take [Step 29](#). [Step 30](#) follows from Cauchy-Schwartz inequality and bounded models. [Step 31](#) is true because  $\theta^*$  is the minimizer of  $R_{\mathcal{D},\ell}(\theta)$ . We have obtained a bound for any  $\theta$  and so for the supremum with regard to  $\theta$ . Therefore:

$$\sup_{\theta \in \mathcal{H}} (R_{\tilde{\mathcal{D}},\ell}(\theta^*) - R_{\tilde{\mathcal{D}},\ell}(\theta)) = R_{\tilde{\mathcal{D}},\ell}(\theta^*) - R_{\tilde{\mathcal{D}},\ell}(\tilde{\theta}) .$$

To lift the discussion to *asymmetric* label noise, risks have to be split into losses for negative and positive examples. Let  $R_{\mathcal{D}^+,\ell}$  be the risk computed over the distribution of the positive examples  $\mathcal{D}^+$  and  $R_{\mathcal{D}^-,\ell}$  the one of the negatives, and denote the mean operators  $\mu_{\mathcal{D}^+}, \mu_{\mathcal{D}^-}$  accordingly. Also, define the probability of positive and negative labels in  $\mathcal{D}$  as  $\pi_{\pm} = \mathbb{P}(y = \pm 1)$ . The same manipulations for the symmetric case let us write

$$\begin{aligned} R_{\tilde{\mathcal{D}},\ell}(\theta^*) - R_{\tilde{\mathcal{D}},\ell}(\theta) &= \pi_- (R_{\mathcal{D}^-,\ell}(\theta^*) - R_{\mathcal{D}^-,\ell}(\theta)) + \pi_+ (R_{\mathcal{D}^+,\ell}(\theta^*) - R_{\mathcal{D}^+,\ell}(\theta)) \\ &\quad + 2ap_- \pi_- \langle \theta^* - \theta, \mu_{\mathcal{D}^-} \rangle + 2ap_+ \pi_+ \langle \theta^* - \theta, \mu_{\mathcal{D}^+} \rangle \\ &\leq (R_{\mathcal{D},\ell}(\theta^*) - R_{\mathcal{D},\ell}(\theta)) + 2a\langle \theta^* - \theta, p_- \mu_{\mathcal{D}^-} + p_+ \mu_{\mathcal{D}^+} \rangle \\ &\leq 4|a|B \cdot \|p_- \pi_- \mu_{\mathcal{D}^-} + p_+ \pi_+ \mu_{\mathcal{D}^+}\|_2 \\ &\leq 4|a|B \max(p_-, p_+) \cdot \|\pi_- \mu_{\mathcal{D}^-} + \pi_+ \mu_{\mathcal{D}^+}\|_2 \\ &= 4|a|B \max(p_-, p_+) \cdot \|\mu_{\mathcal{D}}\|_2 . \end{aligned}$$

Then, we conclude the proof by the same argument for the symmetric case. The first corollary is immediate. For the second, we first recall the definition of a function  $f$  strongly convex.

**Definition 4** A differentiable function  $f(x)$  is  $\gamma$ -strongly convex if for all  $x, x' \in \text{Dom}(f)$  we have

$$f(x) - f(x') \geq \langle \nabla f(x'), x - x' \rangle + \frac{\gamma}{2} \|x - x'\|_2^2 .$$

If  $\ell$  is differentiable once and  $\gamma$ -strongly convex in the  $\theta$  argument, so it the risk  $R_{\tilde{\mathcal{D}},\ell}$  by composition with

linear functions. Notice also that  $\nabla R_{\tilde{\mathcal{D}},\ell}(\tilde{\boldsymbol{\theta}}^*) = 0$  because  $\tilde{\boldsymbol{\theta}}^*$  is the minimizer. Therefore:

$$\begin{aligned} \epsilon &\geq R_{\tilde{\mathcal{D}},\ell}(\boldsymbol{\theta}^*) - R_{\tilde{\mathcal{D}},\ell}(\tilde{\boldsymbol{\theta}}^*) \\ &\geq \left\langle \nabla R_{\tilde{\mathcal{D}},\ell}(\tilde{\boldsymbol{\theta}}^*), \boldsymbol{\theta}^* - \tilde{\boldsymbol{\theta}}^* \right\rangle + \frac{\gamma}{2} \left\| \boldsymbol{\theta}^* - \tilde{\boldsymbol{\theta}}^* \right\|_2^2 \\ &\geq \frac{\gamma}{2} \left\| \boldsymbol{\theta}^* - \tilde{\boldsymbol{\theta}}^* \right\|_2^2, \end{aligned}$$

which means that

$$\left\| \boldsymbol{\theta}^* - \tilde{\boldsymbol{\theta}}^* \right\|_2^2 \leq \frac{2\epsilon}{\gamma}.$$

■

## A.7 Proof of Lemma 11

$$\begin{aligned} \text{Cov}_{\mathcal{S}}[\mathbf{x}, y] &= \mathbb{E}_{\mathcal{S}}[y\mathbf{x}] - \mathbb{E}_{\mathcal{S}}[y]\mathbb{E}_{\mathcal{S}}[\mathbf{x}] \\ &= \boldsymbol{\mu}_{\mathcal{S}} - \left( \frac{1}{m} \sum_{i:y_i>0} 1 - \frac{1}{m} \sum_{i:y_i<0} 1 \right) \mathbb{E}_{\mathcal{S}}[\mathbf{x}] \\ &= \boldsymbol{\mu}_{\mathcal{S}} - (2\pi_+ - 1) \mathbb{E}_{\mathcal{S}}[\mathbf{x}]. \end{aligned}$$

The second statement follows immediately.

## B Factorization of non linear-odd losses

When  $\ell_o$  is not linear, we can find upperbounds in the form of affine functions. It suffices to be continuous and have asymptotes at  $\pm\infty$ .

**Lemma 5** *Let the loss  $\ell$  be continuous. Suppose that it has asymptotes at  $\pm\infty$ , i.e. there exist  $c_1, c_2 \in \mathbb{R}$  and  $d_1, d_2 \in \mathbb{R}$  such that*

$$\lim_{x \rightarrow +\infty} \ell(x) - c_1x - d_1 = 0, \quad \lim_{x \rightarrow -\infty} \ell(x) - c_2x - d_2 = 0$$

then there exists  $q \in \mathbb{R}$  such that  $\ell_o(x) \leq \frac{c_1+c_2}{2}x + q$ .

**Proof** One can compute the limits at infinity of  $\ell_o$  to get

$$\lim_{x \rightarrow +\infty} \ell_o(x) - \frac{c_1 + c_2}{2}x = \frac{d_1 - d_2}{2}$$

and

$$\lim_{x \rightarrow -\infty} \ell_o(x) - \frac{c_1 + c_2}{2}x = \frac{d_2 - d_1}{2}.$$

Then  $q \doteq \sup\{\ell_o(x) - \frac{c_1+c_2}{2}x\} < +\infty$  as  $\ell_o$  is continuous. Thus  $\ell_o(x) - \frac{c_1+c_2}{2}x \leq q$ .

■

The Lemma covers many cases of practical interest outside the class of LOLs, e.g. hinge, absolute and Huber losses. Exponential loss is the exception since  $\ell_o(x) = -\sinh(x)$  cannot be bounded. Consider now hinge loss:

$\ell(x) = [1 - x]_+$  is not differentiable in 1 nor proper [Reid and Williamson, 2010], however it is continuous with asymptotes at  $\pm\infty$ . Therefore, for any  $\theta$  its empirical risk is bounded as

$$R_{S, \text{hinge}}(\theta) \leq \frac{1}{2} R_{S_{2x}, \text{hinge}}(\theta) - \frac{1}{2} \langle \theta, \mu \rangle + q ,$$

since  $c_1 = 0$  and  $c_2 = 1$ . An alternative proof of this result on hinge is provided next, giving the exact value of  $q = 1/2$ . The odd term for hinge loss is

$$\begin{aligned} \ell_o(x) &= \frac{1}{2} ([1 - x]_+ - [1 + x]_+) \\ &= \frac{1}{4} (-2x + |1 - x| - |1 + x|) \end{aligned}$$

due to an arithmetic trick for the max function:  $\max(a, b) = (a + b)/2 + |b - a|/2$ . Then for any  $x$

$$\begin{aligned} |1 - x| &\leq |x| + 1, \\ |1 + x| &\geq |x| - 1 \end{aligned}$$

and therefore

$$\ell_o(x) \leq \frac{1}{4} (-2x + |x| + 1 - |x| + 1) = \frac{1}{2} (1 - x) .$$

We also provide a “if-and-only-if” version of Lemma 5 fully characterizing which family of losses can be upperbounded by a LOL.

**Lemma 6** *Let  $l : \mathbb{R} \rightarrow \mathbb{R}$  a continuous function. Then there exists  $c_1, d_1, d_2 \in \mathbb{R}$  such that*

$$\limsup_{x \rightarrow +\infty} \ell_o(x) - c_1 x - d_1 = 0 \tag{32}$$

and

$$\limsup_{x \rightarrow -\infty} \ell_o(x) - c_1 x - d_2 = 0 , \tag{33}$$

if and only if there exists  $q, q' \in \mathbb{R}$  such that  $\ell_o(x) \leq q'x + q$  for every  $x \in \mathbb{R}$ .

**Proof**  $\Rightarrow$ ) Suppose that such limits exist and they are zero for some  $c_1, d_1, d_2$ . Let prove that  $\ell_o$  is bounded from above by a line.

$$q = \sup_{x \in \mathbb{R}} \{\ell_o(x) - c_1 x\} < \infty ,$$

because  $\ell_o$  is continuous. So for every  $x \in \mathbb{R}$

$$\ell_o(x) \leq c_1 x + q .$$

In particular we can take  $c_1$  as the angular coefficient of the line.

$\Leftarrow$ ) Vice versa we proceed by contradiction. Suppose that there exists  $q, q' \in \mathbb{R}$  such that  $\ell_o$  is bounded from above by  $\ell(x) = q'x + q$ . Suppose in addition that the conditions on the asymptotes (32) and (33) are false. This implies either the existence of a sequence  $x_n \rightarrow +\infty$  such that

$$\lim_{n \rightarrow \infty} \ell_o(x_n) - q'x_n \rightarrow \pm\infty ,$$

or the existence of another sequence  $x'_n \rightarrow -\infty$

$$\lim_{n \rightarrow \infty} \ell_o(y_n) - q'x'_n \rightarrow \pm\infty .$$

On one hand, if at least one of these two limits is  $+\infty$  then we already reach a contradiction, because  $\ell_o(x)$  is supposed to be bounded from above by  $\ell(x) = q'x + q$ . Suppose on the other hand that  $x_n \rightarrow +\infty$  is such that

$$\lim_{n \rightarrow +\infty} \ell_o(x_n) - q'x_n \rightarrow -\infty .$$

Then defining  $x'_n = -x_n$  we have

$$\lim_{n \rightarrow +\infty} \ell_o(w_n) - mx'_n \rightarrow +\infty ,$$

and for the same reason as above we reach a contradiction. ■

## C Factorization of square loss for regression

We have formulated the Factorization Theorem for classification problems. However, a similar property holds for regression with square loss:  $f(\langle \boldsymbol{\theta}, \mathbf{x}_i \rangle, y) = (\langle \boldsymbol{\theta}, \mathbf{x}_i \rangle - y_i)^2$  factors as

$$\mathbb{E}_{\mathcal{S}}[(\langle \boldsymbol{\theta}, \mathbf{x} \rangle - y)^2] = \mathbb{E}_{\mathcal{S}}[\langle \boldsymbol{\theta}, \mathbf{x} \rangle^2] + \mathbb{E}_{\mathcal{S}}[y^2] - 2\langle \boldsymbol{\theta}, \boldsymbol{\mu} \rangle .$$

Taking the minimizers on both sides we obtain

$$\begin{aligned} \operatorname{argmin}_{\boldsymbol{\theta}} \mathbb{E}_{\mathcal{S}}[f(\langle \boldsymbol{\theta}, \mathbf{x} \rangle, y)] &= \operatorname{argmin}_{\boldsymbol{\theta}} \mathbb{E}_{\mathcal{S}}[\langle \boldsymbol{\theta}, \mathbf{x} \rangle^2] - 2\langle \boldsymbol{\theta}, \boldsymbol{\mu} \rangle \\ &= \operatorname{argmin}_{\boldsymbol{\theta}} \|X^{\top} \boldsymbol{\theta}\|_2^2 - 2\langle \boldsymbol{\theta}, \boldsymbol{\mu} \rangle . \end{aligned}$$

## D The role of LOLs in [du Plessis et al. \[2015\]](#)

Let  $\pi_+ \doteq \mathbb{P}(y = 1)$  and let  $\mathcal{D}_+$  and  $\mathcal{D}_-$  respectively the set of positive and negative examples in  $\mathcal{D}$ . Consider first

$$\mathbb{E}_{(\mathbf{x}, \cdot) \sim \mathcal{D}}[\ell(-\langle \boldsymbol{\theta}, \mathbf{x} \rangle)] = \pi_+ \mathbb{E}_{(\mathbf{x}, \cdot) \sim \mathcal{D}_+}[\ell(-\langle \boldsymbol{\theta}, \mathbf{x} \rangle)] + (1 - \pi_+) \mathbb{E}_{(\mathbf{x}, \cdot) \sim \mathcal{D}_-}[\ell(-\langle \boldsymbol{\theta}, \mathbf{x} \rangle)] \quad (34)$$

Then, it is also true that

$$\mathbb{E}_{(\mathbf{x}, y) \sim \mathcal{D}}[\ell(y\langle \boldsymbol{\theta}, \mathbf{x} \rangle)] = \pi_+ \mathbb{E}_{(\mathbf{x}, y) \sim \mathcal{D}_+}[\ell(y\langle \boldsymbol{\theta}, \mathbf{x} \rangle)] + (1 - \pi_+) \mathbb{E}_{(\mathbf{x}, y) \sim \mathcal{D}_-}[\ell(y\langle \boldsymbol{\theta}, \mathbf{x} \rangle)] . \quad (35)$$

Now, solve Equation 34 for  $(1 - \pi_+) \mathbb{E}_{(\mathbf{x}, y) \sim \mathcal{D}_-}[\ell(y\langle \boldsymbol{\theta}, \mathbf{x} \rangle)] = (1 - \pi_+) \mathbb{E}_{(\mathbf{x}, y) \sim \mathcal{D}_-}[-\ell(-\langle \boldsymbol{\theta}, \mathbf{x} \rangle)]$  and substitute it into Equation 35 so as to obtain:

$$\begin{aligned} \mathbb{E}_{(\mathbf{x}, y) \sim \mathcal{D}}[\ell(y\langle \boldsymbol{\theta}, \mathbf{x} \rangle)] &= \pi_+ \mathbb{E}_{(\mathbf{x}, y) \sim \mathcal{D}_+}[\ell(y\langle \boldsymbol{\theta}, \mathbf{x} \rangle)] + \mathbb{E}_{(\mathbf{x}, \cdot) \sim \mathcal{D}}[\ell(-\langle \boldsymbol{\theta}, \mathbf{x} \rangle)] - \pi_+ \mathbb{E}_{(\mathbf{x}, \cdot) \sim \mathcal{D}_+}[\ell(-\langle \boldsymbol{\theta}, \mathbf{x} \rangle)] \\ &= \pi_+ (\mathbb{E}_{(\mathbf{x}, y) \sim \mathcal{D}_+}[\ell(+\langle \boldsymbol{\theta}, \mathbf{x} \rangle)] - \mathbb{E}_{(\mathbf{x}, \cdot) \sim \mathcal{D}_+}[\ell(-\langle \boldsymbol{\theta}, \mathbf{x} \rangle)]) + \mathbb{E}_{(\mathbf{x}, \cdot) \sim \mathcal{D}}[\ell(-\langle \boldsymbol{\theta}, \mathbf{x} \rangle)] \\ &= \frac{\pi_+}{2} \mathbb{E}_{(\mathbf{x}, y) \sim \mathcal{D}_+}[\ell_o(+\langle \boldsymbol{\theta}, \mathbf{x} \rangle)] + \mathbb{E}_{(\mathbf{x}, \cdot) \sim \mathcal{D}}[\ell(-\langle \boldsymbol{\theta}, \mathbf{x} \rangle)] , \end{aligned} \quad (36)$$

by our usual definition of  $\ell_o(x) = \frac{1}{2}(\ell(x) - \ell(-x))$ . Recall that one of the goals of the authors is to conserve the convexity of this new crafted loss function. Then, [du Plessis et al. \[2015, Theorem 1\]](#) proceeds stating that when  $\ell_o$  is convex, it must also be linear. And therefore they must focus on LOLs. The result of [du Plessis et al. \[2015, Theorem 1\]](#) is immediate from the point of view of our theory: in fact, an odd function can be convex or concave only if it also linear. The resulting expression based on the fact  $\ell(x) - \ell(-x) = 2ax$  simplifies into

$$\begin{aligned} \mathbb{E}_{(\mathbf{x}, y) \sim \mathcal{D}}[\ell(y\langle \boldsymbol{\theta}, \mathbf{x} \rangle)] &= a\pi_+ \mathbb{E}_{(\mathbf{x}, y) \sim \mathcal{D}_+}[y\langle \boldsymbol{\theta}, \mathbf{x} \rangle] + \mathbb{E}_{(\mathbf{x}, \cdot) \sim \mathcal{D}}[\ell(-\langle \boldsymbol{\theta}, \mathbf{x} \rangle)] \\ &= a\pi_+ \boldsymbol{\mu}_{\mathcal{D}_+} + \mathbb{E}_{(\mathbf{x}, \cdot) \sim \mathcal{D}}[\ell(-\langle \boldsymbol{\theta}, \mathbf{x} \rangle)] . \end{aligned}$$

where  $\boldsymbol{\mu}_{\mathcal{D}_+}$  is a mean operator computed on positive examples only. Notice how the second term is instead label independent, although it is not an even function as in the Factorization Theorem.

## E Additional examples of loss factorization

|              | loss                           | even function $\ell_e$                   | odd function $\ell_o$                             |
|--------------|--------------------------------|------------------------------------------|---------------------------------------------------|
| generic      | $\ell(x)$                      | $\frac{1}{2}(\ell(x) + \ell(-x))$        | $\frac{1}{2}(\ell(x) - \ell(-x))$                 |
| 01           | $1\{x \leq 0\}$                | $1 - \frac{1}{2}\{x \neq 0\}$            | $-\frac{1}{2}\text{sign}(x)$                      |
| exponential  | $e^{-x}$                       | $\cosh(x)$                               | $-\sinh(x)$                                       |
| hinge        | $[1 - x]_+$                    | $\frac{1}{2}([1 - x]_+ - [1 - x]_-)$     | $\frac{1}{2}([1 - x]_+ + [1 - x]_-)$ <sup>†</sup> |
| LOL          | $\ell(x)$                      | $\frac{1}{2}(\ell(x) + \ell(-x))$        | $-ax$                                             |
| $\rho$ -loss | $\rho x  - \rho x + 1$         | $\rho x  + 1$                            | $-\rho x$ ( $\rho \geq 0$ )                       |
| unhinged     | $1 - x$                        | 1                                        | $-x$                                              |
| perceptron   | $\max(0, -x)$                  | $x \text{ sign}(x)$                      | $-x$                                              |
| 2-hinge      | $\max(-x, 1/2 \max(0, 1 - x))$ | $\dagger\dagger$                         | $-x$                                              |
| SPL          | $a_l + l^*(-x)/b_l$            | $a_l + \frac{1}{2b_l}(l^*(x) + l^*(-x))$ | $-x/(2b_l)$                                       |
| logistic     | $\log(1 + e^{-x})$             | $\frac{1}{2} \log(2 + e^x + e^{-x})$     | $-x/2$                                            |
| square       | $(1 - x)^2$                    | $1 + x^2$                                | $-2x$                                             |
| Matsushita   | $\sqrt{1 + x^2} - x$           | $\sqrt{1 + x^2}$                         | $-x$                                              |

Table 1: Factorization of losses in light of Theorem 12. <sup>†</sup>The odd term of hinge loss is upperbounded by  $(1 - x)/2$  in B. <sup>††</sup>  $= \max(-x, 1/2 \max(0, 1 - x)) + \max(x, 1/2 \max(0, 1 + x))$ .

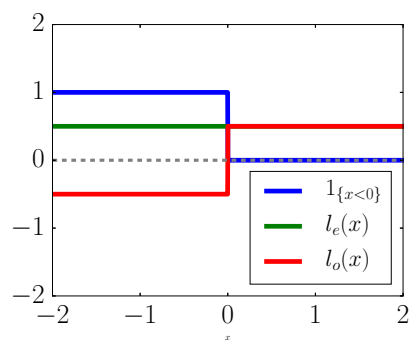

(a) 0-1 loss

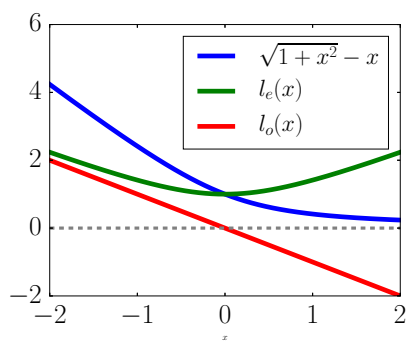

(b) Matsushita loss

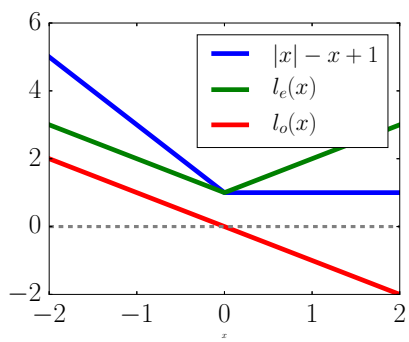

(c)  $\rho$ -loss,  $\rho=1$

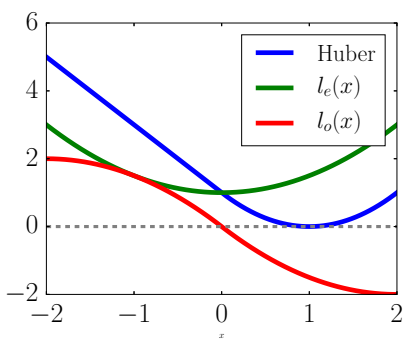

(d) Huber loss

## References

- C. McDiarmid. Concentration. In M. Habib, C. McDiarmid, J. Ramirez-Alfonsin, and B. Reed, editors, *Probabilistic Methods for Algorithmic Discrete Mathematics*, pages 1–54. Springer Verlag, 1998.
- P.-L. Bartlett and S. Mendelson. Rademacher and gaussian complexities: Risk bounds and structural results. *JMLR*, 3:463–482, 2002.
- N. Natarajan, I. S. Dhillon, P. K. Ravikumar, and A. Tewari. Learning with noisy labels. In *NIPS\*27*, 2013.
- B. van Rooyen, A. K. Menon, and R. C. Williamson. Learning with symmetric label noise: The importance of being unhinged. In *NIPS\*29*, 2015.
- N. Manwani and P. S. Sastry. Noise tolerance under risk minimization. *Cybernetics, IEEE Transactions on*, 43(3):1146–1151, 2013.
- M. D. Reid and R. C. Williamson. Composite binary losses. *JMLR*, 11:2387–2422, 2010.
- M C. du Plessis, G. Niu, and M. Sugiyama. Convex formulation for learning from positive and unlabeled data. In *32<sup>th</sup> ICML*, pages 1386–1394, 2015.
